# Supplementary material
Source: PubMed Central journal article supplement (PMC3094108)

## **Figure Legends.**

### **Supplemental Movie S1, mitochondrial dynamics at the immune synapse.**

J77 T cells transfected with mitoYFP were allowed to settle onto anti-CD3 plus anti-CD28 coated coverslips in Attofluor open chambers (Invitrogen) at 37°C in a 5% CO<sub>2</sub> atmosphere. Mitochondria located close to the activating surface were visualized with a Leica AM TIRF MC M, mounted on a Leica DMI 6000B microscope. Images were acquired (10 images per second) and processed with the accompanying confocal software (LCS; Leica).

**Supplemental Figure 1.** Mitochondria accumulation at the IS in J77 T cells conjugated with unpulsed or SEE-pulsed Raji B cells (S1A) or CH7C17 T cells conjugated with unpulsed or HA-pulsed Hom2 APCs. Quantification of mitochondria accumulation at the IS was performed as described in Materials and Methods from maximum projections of confocal Z stacks of conjugates preloaded with mitotracker orange. Data are means  $\pm$  s.d. from 100-150 conjugates per condition from three independent experiments.

**Supplemental Figure 2.** Time course of Drp1 content in mitochondrial fractions of J77 and CH7C17 T cells conjugated with unpulsed or antigen-pulsed APCs during the indicated times. MnSOD was used as mitochondrial marker. Blots are representative of two independent experiments.

**Supplemental Figure 3. MTOC translocation facilitates mitochondria redistribution to the immune synapse.**

(A) Time-lapse confocal microscopy showing mitochondrial localization (mitotracker, red) in SEE-stimulated J77 T cells overexpressing p50GFP, which prevents MTOC translocation; mitochondrial localization in control cells is shown by mitoYFP expression. Arrows mark the MTOC (p50GFP, green). (B,C) Quantification of MTOC and mitochondrial accumulation at the IS calculated from maximal Z projections (see Methods). Data represent means  $\pm$  s.d. of 100 conjugates from three experiments ( $p < 0.001$ , ANOVA in B and  $p < 0.0001$ , Mann Whitney in C).

**Supplemental Figure 4.** Confocal video-microscopy of mitoYFP transfected J77 T cells loaded with the mitochondrial membrane potential dye TMRM and plated on an irrelevant Ab and PLL-coated coverslips. Images record the movement of individual mitochondria in a confocal plane at the surface. Right panel shows time course of mitoYFP and TMRM fluorescence intensity in the indicated mitochondria (regions of interest, ROI). Scale bar, 5 $\mu$ m.

**Supplemental Figure 5.** Intracellular calcium flux in control and Drp1-silenced J77 T cells activated with CD3 Ab (10  $\mu$ g/ml). A representative experiment out of three is shown.

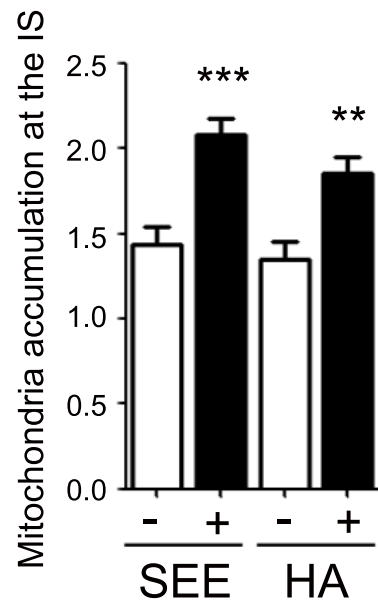

Supplemental Figure 2

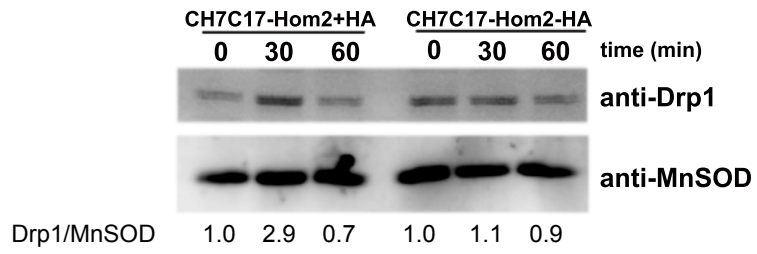

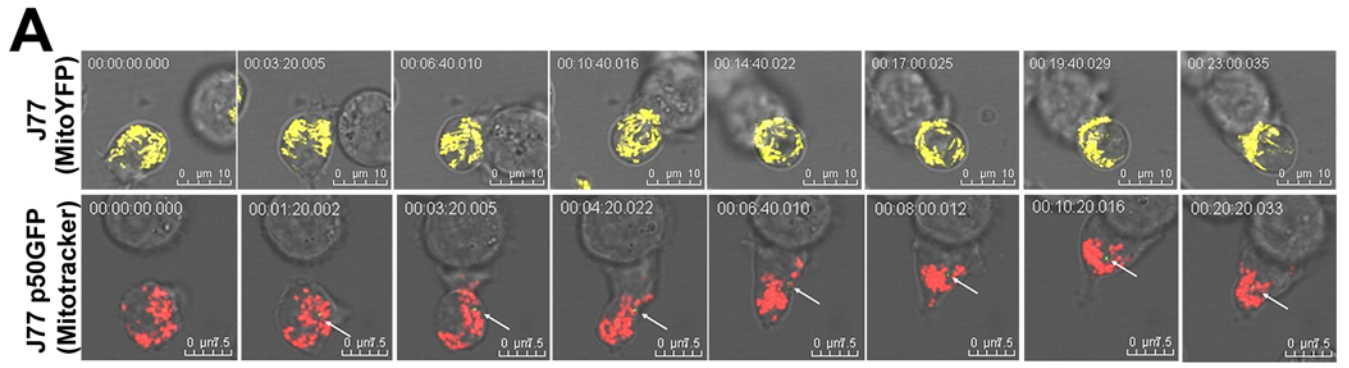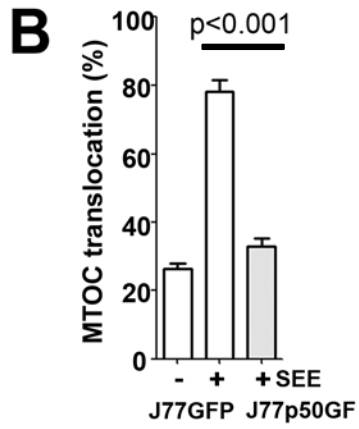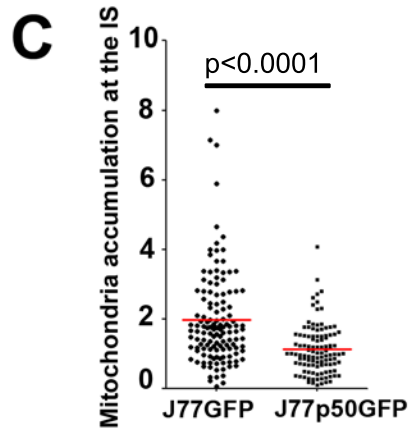

Supplemental Figure 4

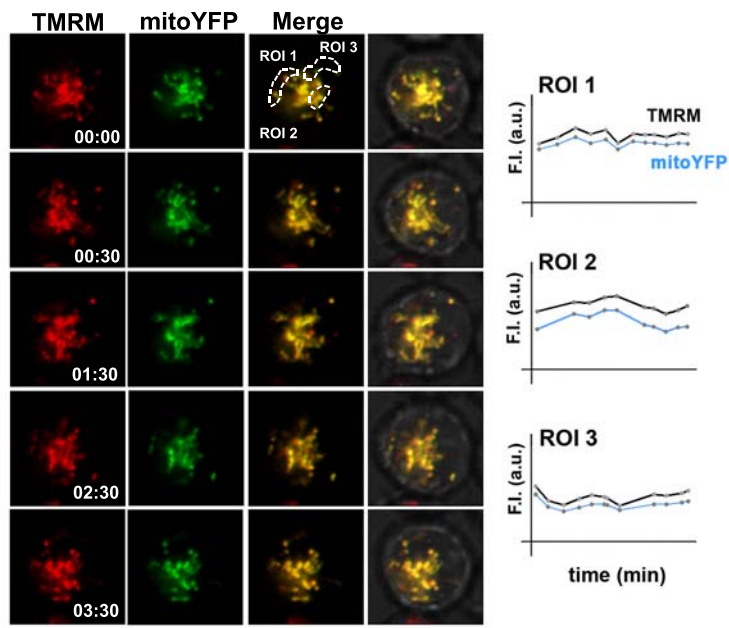

Supplemental Figure 5

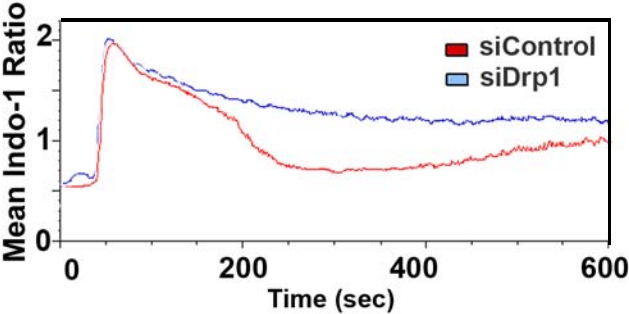

Supplement: emboj201125s1.pdf [file emboj201125s1.pdf]
